# Supplementary material for: High-throughput preparation of Mn2+-doped CsPbCl3 nanocrystals via a fluidic channel reaction
Source: Royal Society of Chemistry journal article supplement (doi:10.1039/d3tc04680j), 2024-01-01
Supplement: d3tc04680j1.pdf [file d3tc04680j1.pdf]

## High-throughput preparation of Mn<sup>2+</sup>-doped CsPbCl<sub>3</sub> nanocrystals via fluidic channel reaction

Jingshan Hou,<sup>a</sup> Qing Zhang,<sup>a</sup> Runze Guo,<sup>a</sup> Jianghua Wu,<sup>a</sup> Langping Dong,<sup>a</sup> Guoying Zhao,<sup>a</sup> Ganghua Zhang,<sup>a</sup> Wei Gao,<sup>a,\*</sup> Yufeng Liu,<sup>a,\*</sup> and Yongzheng Fang<sup>a,\*</sup>

<sup>a</sup> School of Materials Science and Engineering, Shanghai Institute of Technology, Shanghai, 201418, China. \*E-mail: weigao@sit.edu.cn (W. Gao), yfliu@mail.sitp.ac.cn (Y.F. Liu), fyz1003@sina.com (Y.F. Fang).

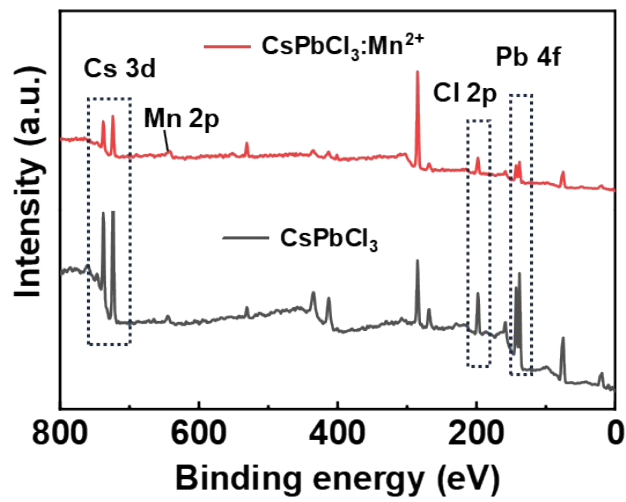

Fig. S1 XPS spectra of survey.

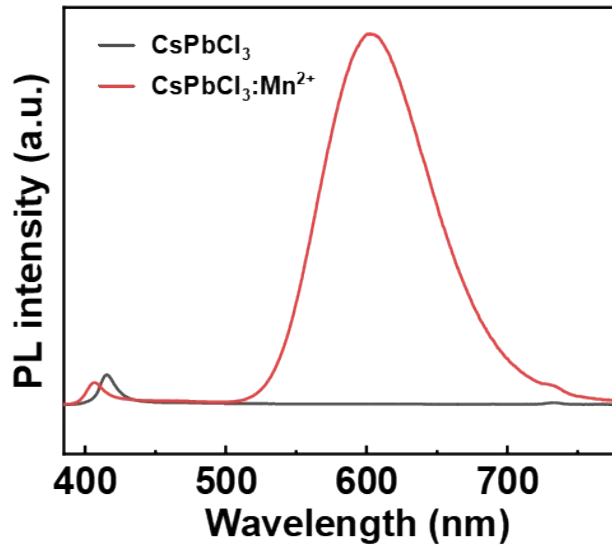

Fig. S2 PL spectra of undoped and Mn-doped  $\text{CsPbCl}_3$  NCs.

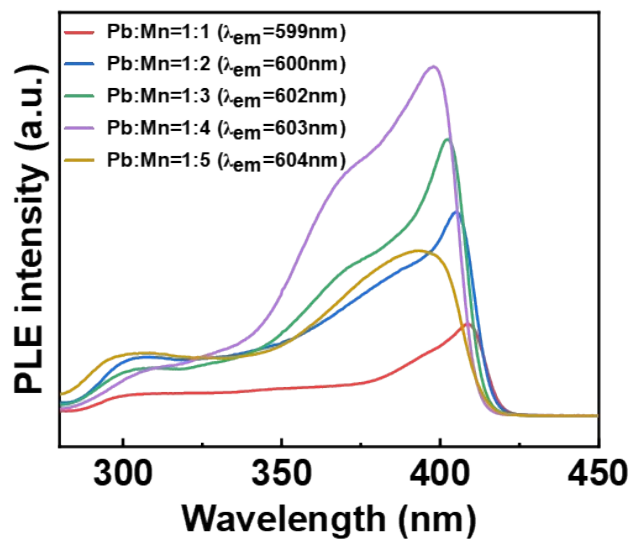

Fig. S3 PLE spectra of Mn-doped  $\text{CsPbCl}_3$  NCs monitored at the optimal emission wavelength (599 nm, 600 nm, 602 nm, 603 nm, 604 nm for samples with Pb:Mn ratio of 1:1, 1:2, 1:3, 1:4 and 1:5, respectively).

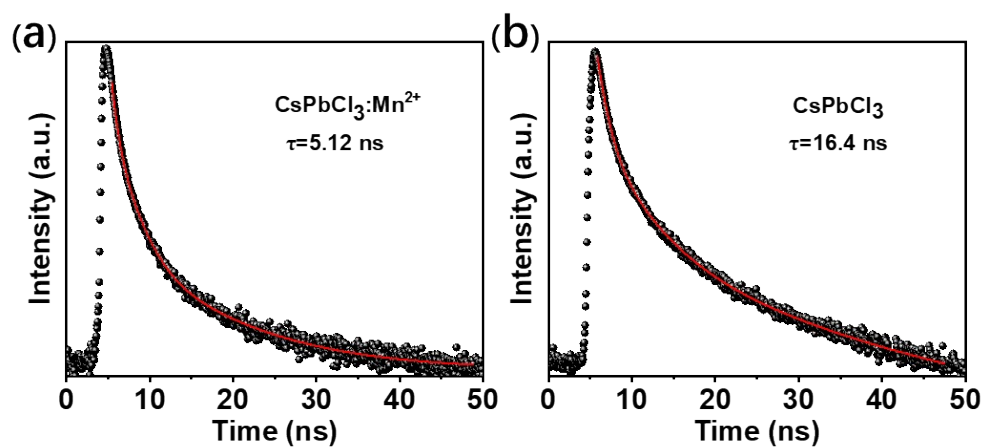

Fig. S4 Time-resolved PL spectra of (a) Mn-doped CsPbCl<sub>3</sub> NCs of excitonic emission and (b) undoped CsPbCl<sub>3</sub>:Mn<sup>2+</sup> NCs.

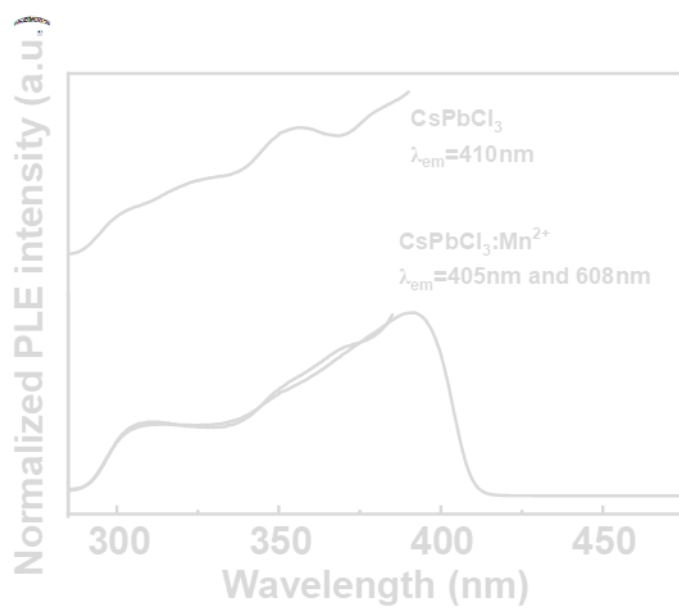

Fig. S5 Comparison of Normalized PLE spectra for undoped CsPbCl<sub>3</sub> and Mn-doped CsPbCl<sub>3</sub> NCs.

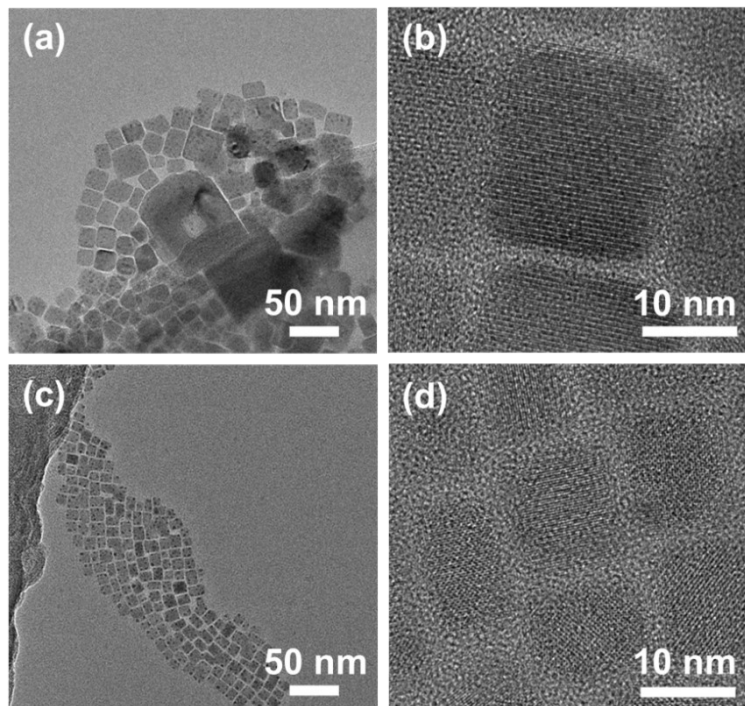

Fig. S6 TEM images of Mn-doped CsPbCl<sub>3</sub> NCs synthesized at flow rates of (a, b) 200 μL/min and (c, d) 1000 μL/min.

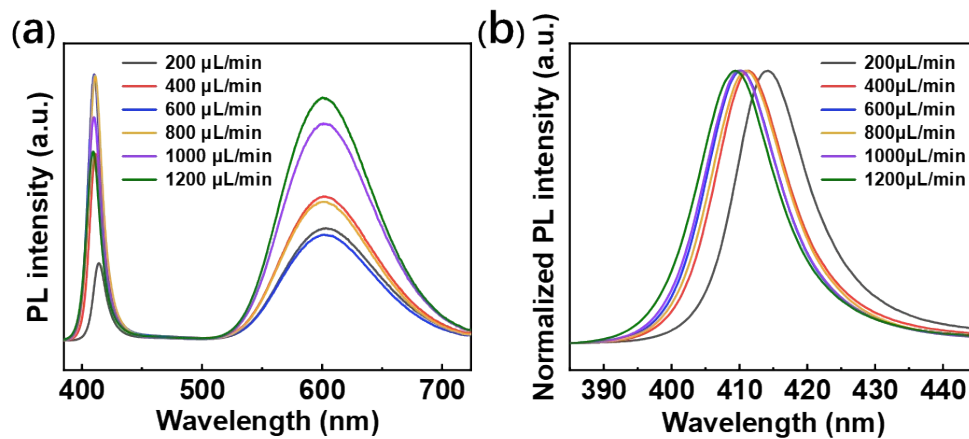

Fig. S7 PL Spectra of (a) Mn-doped CsPbCl<sub>3</sub> NCs at different flow rates and (b) Normalized spectrum at 410nm.

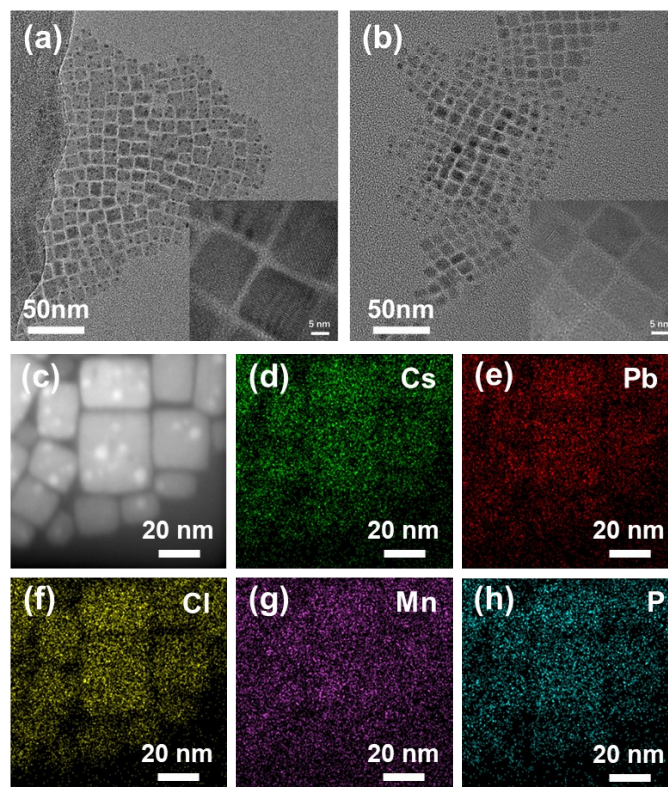

**Fig. S8** TEM images of Mn-doped CsPbCl<sub>3</sub> NCs prepared by (a) the fluidic channel reaction strategy and (b) hot injection method, and mapping images (c-h) of Mn-doped CsPbCl<sub>3</sub> NCs prepared by the fluidic channel reaction strategy.

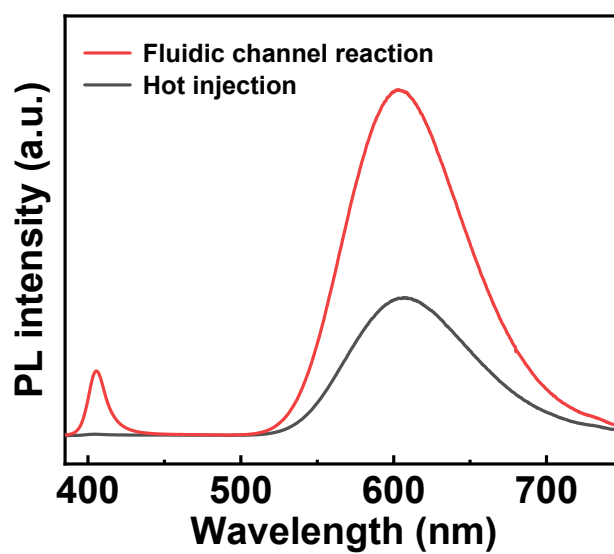

**Fig. S9** PL spectra of the Mn-doped CsPbCl<sub>3</sub> samples prepared by the fluidic channel reaction and hot injection method.

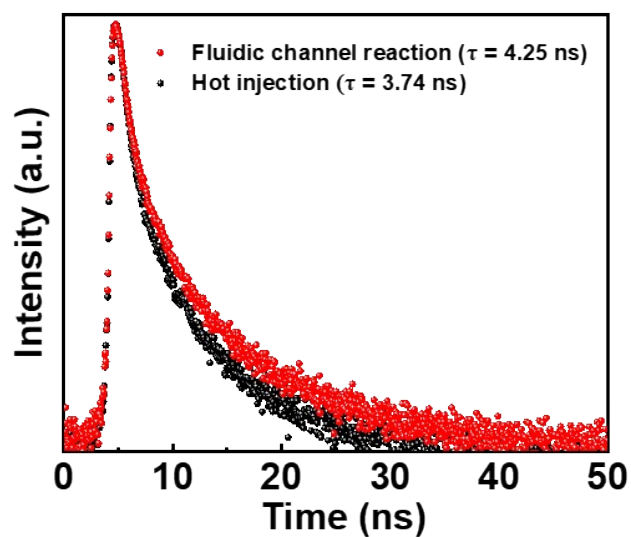

**Fig. S10** Time resolved PL lifetime of the Mn-doped CsPbCl<sub>3</sub> samples prepared by the fluidic channel reaction and hot injection methods.

**Table S1** Reaction time corresponding to different flow rate

|                    |       |       |       |      |      |      |
|--------------------|-------|-------|-------|------|------|------|
| Flow rate (μL/min) | 200   | 400   | 600   | 800  | 1000 | 1200 |
| Reaction time (s)  | 37.68 | 18.84 | 12.56 | 9.42 | 7.54 | 6.28 |
